# Supplementary material
Source: PubMed Central journal article supplement (PMC4245717)
Supplement: nl5028183_si_001.pdf [file nl5028183_si_001.pdf]

**Supporting Information for**  
**Experimental Realization of a Polarization-Independent**  
**Ultraviolet/Visible Coaxial Plasmonic Metamaterial**

M.A. van de Haar, R. Maas, H. Schokker, and A. Polman

Center for Nanophotonics, FOM Institute AMOLF,

Science Park 104, 1098 XG Amsterdam, the Netherlands

polman@amolf.nl

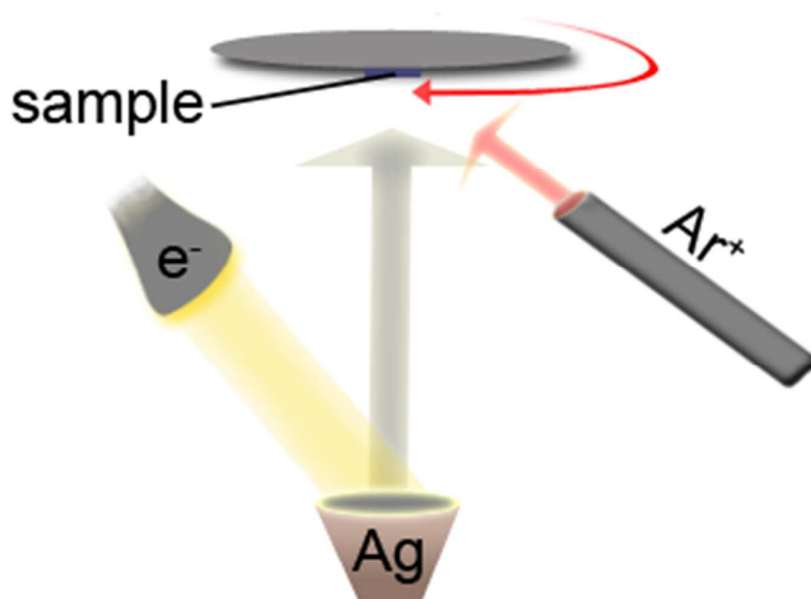

**Supplementary Figure S1** Sketch of the metal infilling process: The sample is mounted on a rotation stage above the metal source. After every 15 nm of evaporated metal the electron beam is switched off and we mill the excess amount of metal growing on top of the coaxes with the argon ion beam.
